# Supplementary material for: Development of a Screening Tool for Assessing Sexual Difficulties Among Patients with Parkinson’s Disease: The PD-SDS
Source: PubMed Central journal article supplement — J Parkinsons Dis. 2024 Jul 23;14(5):1015–25. doi: 10.3233/JPD-240063 (PMC11307097; doi:10.3233/jpd-240063), 2024-07-23
Supplement: jpd-14-jpd240063-s001.pdf [file jpd-14-jpd240063-s001.pdf]

# Supplementary Material

## Development of a Screening Tool for Assessing Sexual Difficulties Among Patients with Parkinson's Disease: The PD-SDS

### French version of the PD-SDS

**Instructions:** « Il est reconnu que les symptômes moteurs et non-moteurs de la maladie de Parkinson (lenteur des mouvements, rigidité, raideur musculaire, tremblement, engourdissement, fatigue, douleur, etc.) et les effets secondaires de certains traitements peuvent provoquer des altérations dans le fonctionnement sexuel de la personne. Lorsque nous évoquerons « les symptômes », il s'agira des symptômes moteurs et non-moteurs de la maladie de Parkinson. Indiquez pour chacune des affirmations suivantes à quel point elle correspond à ce que vous avez ressenti ou vécu ces derniers temps. »

| “Ces derniers temps ...”                                                               | Cela ne me correspond pas du tout | Cela me correspond un peu | Cela me correspond assez bien | Cela me correspond tout à fait |
|----------------------------------------------------------------------------------------|-----------------------------------|---------------------------|-------------------------------|--------------------------------|
| 1. J'ai peur de décevoir un(e)/mon(ma) partenaire sexuel(le)                           | <input type="checkbox"/>          | <input type="checkbox"/>  | <input type="checkbox"/>      | <input type="checkbox"/>       |
| 2. J'ai plus de fantasmes sexuels qu'habituellement                                    | <input type="checkbox"/>          | <input type="checkbox"/>  | <input type="checkbox"/>      | <input type="checkbox"/>       |
| 3. J'ai perdu confiance en moi sexuellement                                            | <input type="checkbox"/>          | <input type="checkbox"/>  | <input type="checkbox"/>      | <input type="checkbox"/>       |
| 4. J'éprouve du plaisir lors d'une activité sexuelle *                                 | <input type="checkbox"/>          | <input type="checkbox"/>  | <input type="checkbox"/>      | <input type="checkbox"/>       |
| 5. Je me masturbe plus souvent que d'habitude                                          | <input type="checkbox"/>          | <input type="checkbox"/>  | <input type="checkbox"/>      | <input type="checkbox"/>       |
| 6. Je me sens diminué(e) dans ma vie sexuelle                                          | <input type="checkbox"/>          | <input type="checkbox"/>  | <input type="checkbox"/>      | <input type="checkbox"/>       |
| 7. Je me sens plus excité(e) que d'habitude                                            | <input type="checkbox"/>          | <input type="checkbox"/>  | <input type="checkbox"/>      | <input type="checkbox"/>       |
| 8. Certaines positions sexuelles sont limitées par mes symptômes                       | <input type="checkbox"/>          | <input type="checkbox"/>  | <input type="checkbox"/>      | <input type="checkbox"/>       |
| 9. Lors d'un acte sexuel, les douleurs m'empêchent de trouver une position confortable | <input type="checkbox"/>          | <input type="checkbox"/>  | <input type="checkbox"/>      | <input type="checkbox"/>       |
| 10. Mes orgasmes sont satisfaisants*                                                   | <input type="checkbox"/>          | <input type="checkbox"/>  | <input type="checkbox"/>      | <input type="checkbox"/>       |

\*Items inversés

“Cela ne me correspond pas du tout” = 0; “Cela me correspond un peu” = 1; “Cela me correspond assez bien” = 2; “Cela me correspond tout à fait” = 3

Score faible estime sexuelle = item 1 + item 3 + item 6

Score déplaisir sexuel = item 4\* + item 10\*

Score impact sur la position sexuelle = item 8 + item 9

Score hypersexualité = item 2 + item 5 + item 7

**French scale translated into English:**

**Instruction:** It is recognized that the motor and nonmotor symptoms of PD (slowness of movement, rigidity, muscle stiffness, tremor, numbness, fatigue, pain, etc.) and the side effects of certain treatments can cause alterations in the sexual functioning of the person. When we refer to "symptoms", we are referring to the motor and nonmotor symptoms of PD. For each of the following statements, indicate how closely it matches what you have felt or experienced recently.

| "Recently, ..."                                                     | This does not correspond to me at all | This corresponds to me a little | This corresponds to me quite well | This corresponds to me completely |
|---------------------------------------------------------------------|---------------------------------------|---------------------------------|-----------------------------------|-----------------------------------|
| 1. I'm afraid of disappointing a sexual partner                     | <input type="checkbox"/>              | <input type="checkbox"/>        | <input type="checkbox"/>          | <input type="checkbox"/>          |
| 2. I have more sexual fantasies than usual                          | <input type="checkbox"/>              | <input type="checkbox"/>        | <input type="checkbox"/>          | <input type="checkbox"/>          |
| 3. I have lost my sexual confidence                                 | <input type="checkbox"/>              | <input type="checkbox"/>        | <input type="checkbox"/>          | <input type="checkbox"/>          |
| 4. I get pleasure from sexual activity *                            | <input type="checkbox"/>              | <input type="checkbox"/>        | <input type="checkbox"/>          | <input type="checkbox"/>          |
| 5. I masturbate more often than usual                               | <input type="checkbox"/>              | <input type="checkbox"/>        | <input type="checkbox"/>          | <input type="checkbox"/>          |
| 6. I feel diminished in my sex life                                 | <input type="checkbox"/>              | <input type="checkbox"/>        | <input type="checkbox"/>          | <input type="checkbox"/>          |
| 7. I feel more excited than usual                                   | <input type="checkbox"/>              | <input type="checkbox"/>        | <input type="checkbox"/>          | <input type="checkbox"/>          |
| 8. Certain sexual positions are limited by my symptoms              | <input type="checkbox"/>              | <input type="checkbox"/>        | <input type="checkbox"/>          | <input type="checkbox"/>          |
| 9. During sex, pain prevents me from finding a comfortable position | <input type="checkbox"/>              | <input type="checkbox"/>        | <input type="checkbox"/>          | <input type="checkbox"/>          |
| 10. My orgasms are satisfying*                                      | <input type="checkbox"/>              | <input type="checkbox"/>        | <input type="checkbox"/>          | <input type="checkbox"/>          |

\*Reversed items

"this does not correspond to me at all" = 0; "this corresponds to me a little" = 1; "this corresponds to me quite well" = 2; "this corresponds to me completely" = 3

Low sexual esteem score = item 1 + item 3 + item 6

Sexual displeasure score = item 4\* + item 10\*

Impact on sexual position score = item 8 + item 9

Hypersexuality score = item 2 + item 5 + item 7
